# Supplementary material
Source: publisher figshare collection journal article supplement (https://acs.figshare.com/ndownloader/files/4112809)
Supplement: Supplementary file 1 [file 4112809]

## *Supporting Information*

### **Formation of $\alpha$ -Helical Nanofibers by Mixing $\beta$ -Structured and $\alpha$ -Helical Coiled Coil Peptides**

Enrico Brandenburg,<sup>a,‡</sup> Hans v. Berlepsch,<sup>b,‡</sup> Jork Leiterer,<sup>c</sup> Franziska  
Emmerling,<sup>c</sup>

and Beate Kokschr<sup>\*a</sup>

<sup>a</sup> *Department of Chemistry and Biochemistry, Freie Universität Berlin, Takustrasse 3, 14195  
Berlin, Germany*

<sup>b</sup> *Research Center for Electron Microscopy, Freie Universität Berlin, Fabeckstrasse 36a,  
14195 Berlin, Germany*

<sup>c</sup> *BAM Federal Institute for Materials Research and Testing, Richard-Willstätter-Straße 11,  
12489 Berlin, Germany*

#### **Contents:**

1. Helicity scores predicted by AGADIR for VW19 and VW01
2. Change of fluorescence emission spectra of a NIAD-4 containing 200  $\mu$ M VW19 solution at pH 4 with incubation time
3. TEM micrograph of helically twisted fibrils of peptide VW19 after negative staining with PTA
4. Change of CD spectra of VW01 solutions of different peptide concentrations and solvent pHs with incubation time
5. Electron micrographs of 500  $\mu$ M VW01 solutions at different solvent conditions
6. Change of fluorescence spectra of NIAD-4 containing pure VW19 and VW19/VW01 mixed solutions as a function of incubation time
7. Change of CD spectra of VW19/VW01 mixtures as a function of mole fraction of VW01
8. Schematic representation of the aggregation pathways

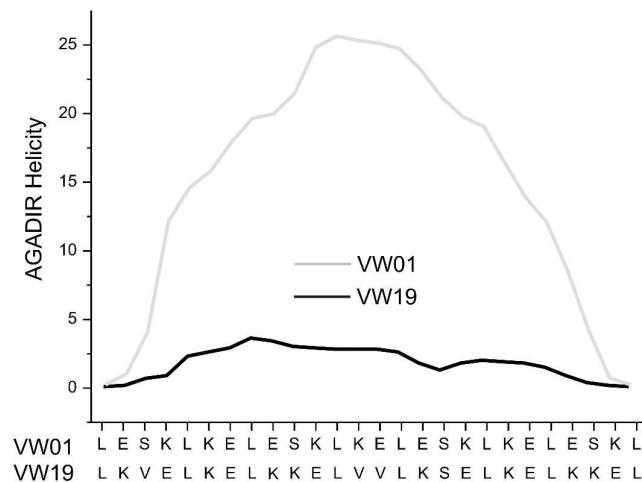

**Figure 1.** Helicity scores predicted by the AGADIR algorithm for VW19 (black line) and VW01 (gray line) at pH 4.0 related to the primary sequence.

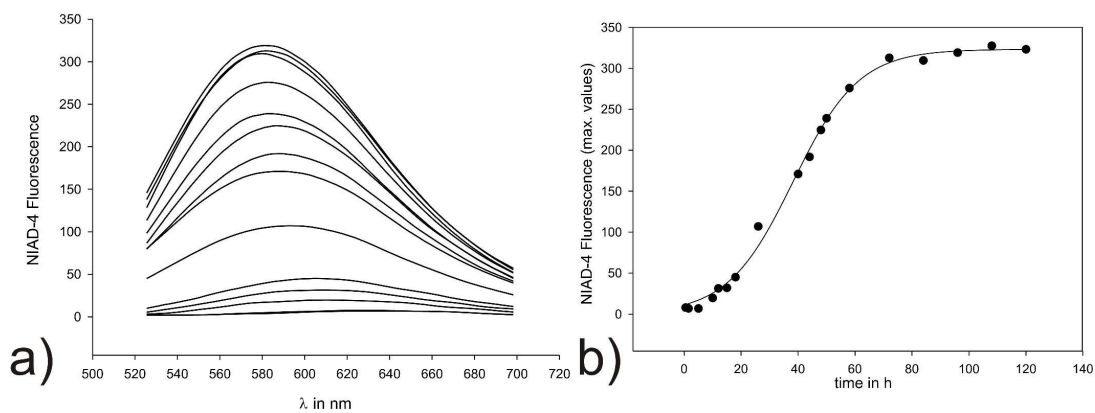

**Figure 2.** Kinetics of amyloid fibril formation of a 200  $\mu$ M VW19 solution in 10 mM acetate buffer at pH 4.0 within 120 hours of incubation monitored by NIAD-4 fluorescence. (a) Complete set of fluorescence emission spectra. (b) Maximum fluorescence intensity as a function of incubation time.

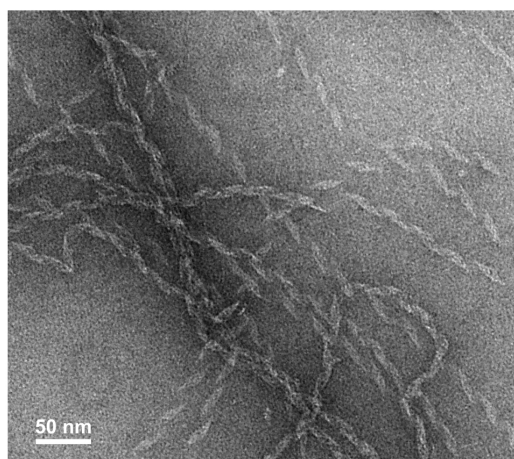

**Figure 3.** TEM micrograph of PTA-stained helically twisted fibrils of peptide VW19 (100  $\mu$ M, acetate buffer at pH 4.0).

Experimental conditions: Samples for staining electron microscopy were prepared by adsorbing 7  $\mu$ L aliquots of peptide solution to a glow discharged carbon coated collodium film on a 400-mesh copper grid. The grids were blotted, stained with 1% phosphotungstic acid (PTA), and air dried. TEM micrographs were taken at a primary magnification of 58300 $\times$  using a defocus of 0.8  $\mu$ m.

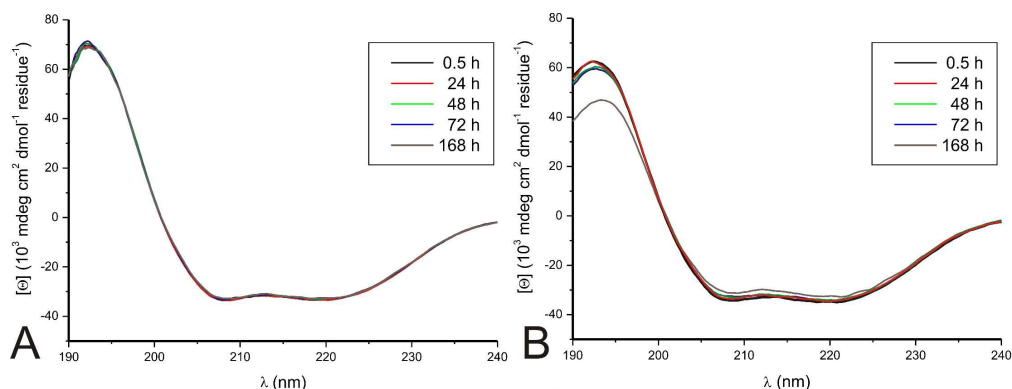

**Figure 4a:** Overlaid CD spectra of VW01 solutions measured after different incubation times up to 168 hours for different pH values and different peptide concentrations. *pH 4,0:* (A) 100  $\mu$ M, (B) 300  $\mu$ M (10 mM Acetate-Buffer, pH 4,0; 10 mM Phosphate-Buffer, pH 7,4; 10 mM Carbonate-Buffer, pH 9,0)

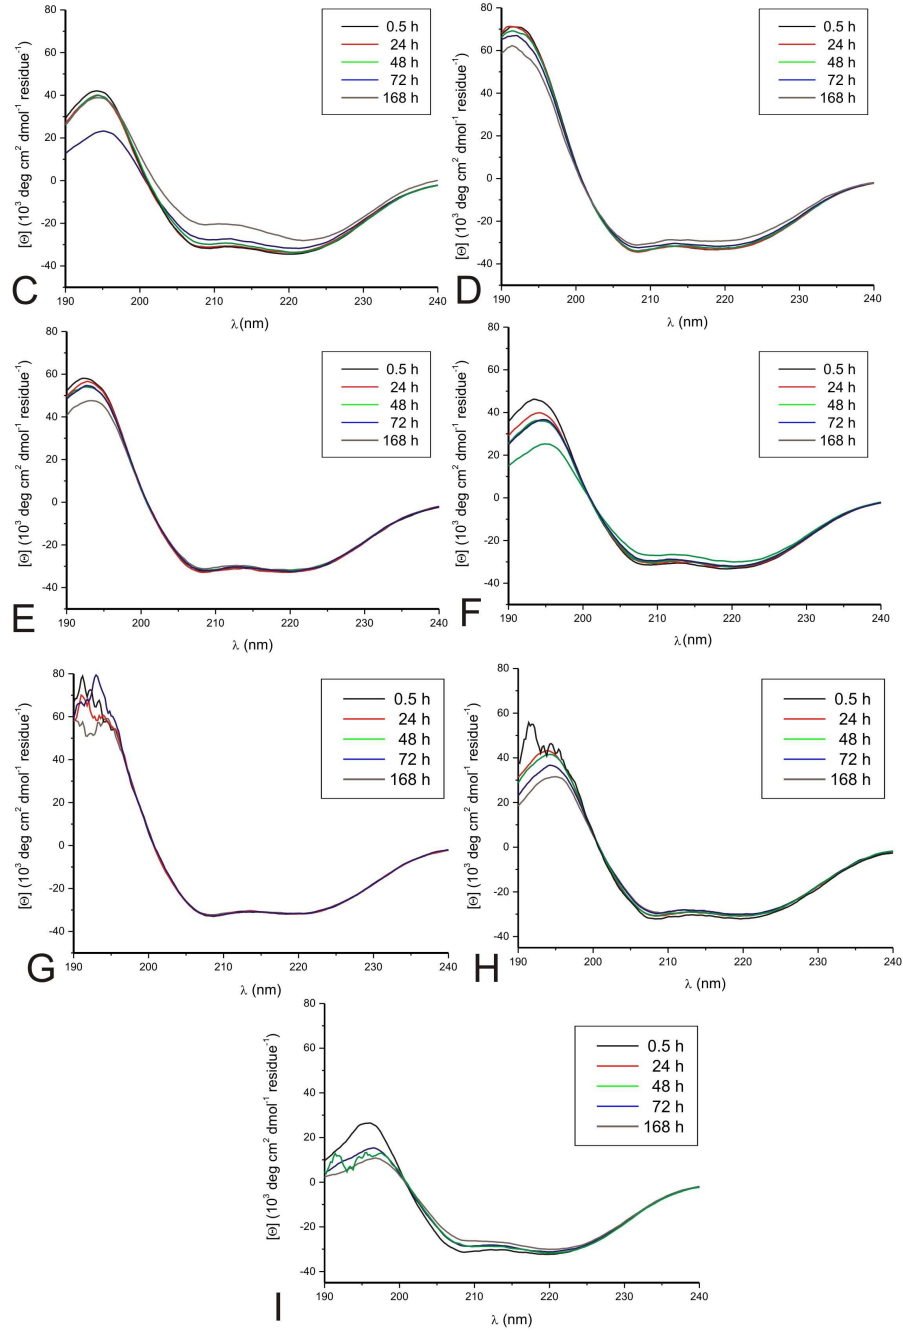

**Figure 4b:** Overlaid CD spectra of VW01 solutions measured after different incubation times up to 168 hours for different pH values and different peptide concentrations (C) 500  $\mu$ M; pH 7.4: (D) 100  $\mu$ M, (E) 300  $\mu$ M, (F) 500  $\mu$ M ;pH 9 (G) 100  $\mu$ M, (H) 300  $\mu$ M, (I) 500  $\mu$ M (10 mM Azetat-Puffer, pH 4,0; 10 mM Phosphat-Puffer, pH 7,4; 10 mM Carbonat-Puffer, pH 9,0)

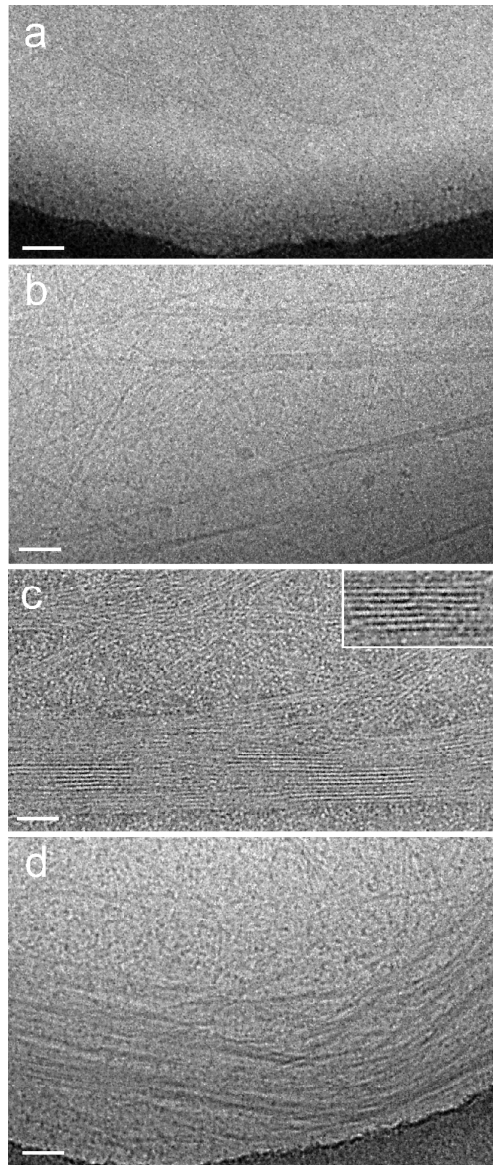

**Figure 5.** Electron micrographs of 500  $\mu$ M VW01 solutions at different pH values. (a) Cryo-TEM; acetate buffer at pH 4.0. (b) Cryo-TEM; phosphate buffer, at pH 7.4. (c) TEM after PTA staining; carbonate buffer at pH 9.0. The inset shows the parallel alignment of individual fibers within a fiber bundle at large magnification. (d) Cryo-TEM; carbonate buffer at pH 9.0. Scale bars: 30 nm.

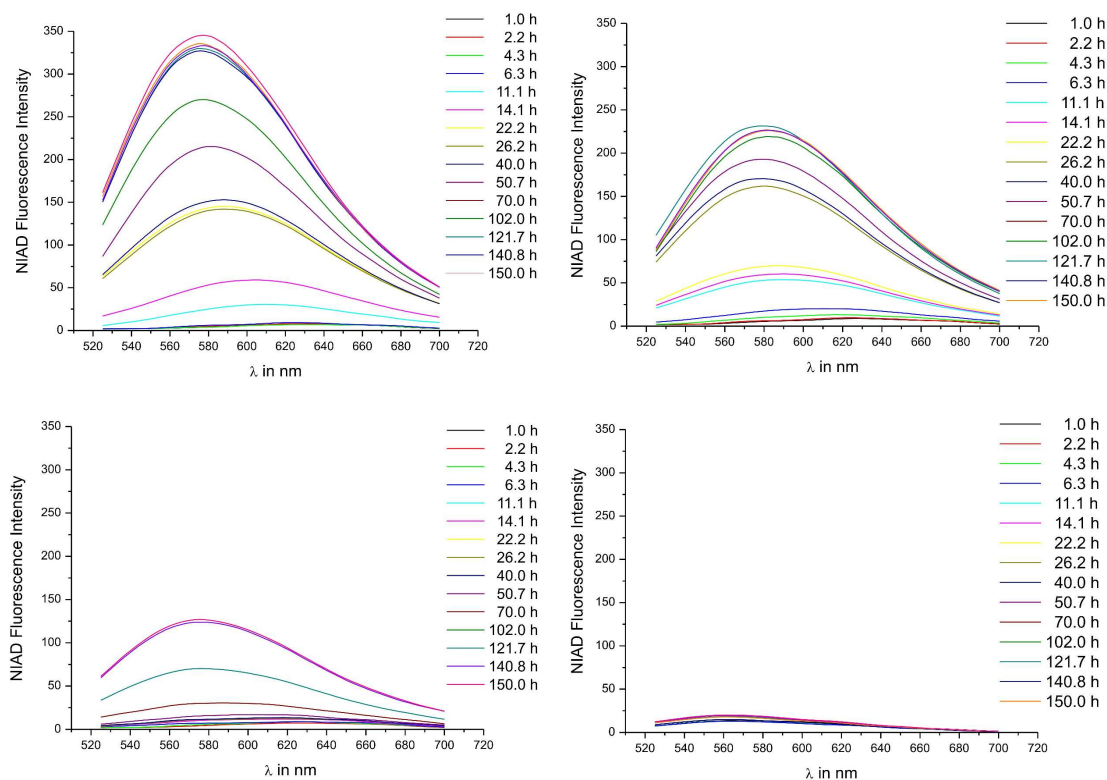

**Figure 6.** Change of NIAD-4 fluorescence of VW19 alone and of VW19/VW01 mixtures as a function of incubation time (from bottom to top). (a) VW19 alone, (b) VW19/VW01 mixing ratio:  $r = 2$ , (c) VW19/VW01 mixing ratio:  $r = 1$ , (d) VW19/VW01 mixing ratio:  $r = 0.5$ . All samples contained  $150\ \mu\text{M}$  of VW19 and were prepared in  $10\ \text{mM}$  acetate buffer at  $\text{pH } 4.0$ .



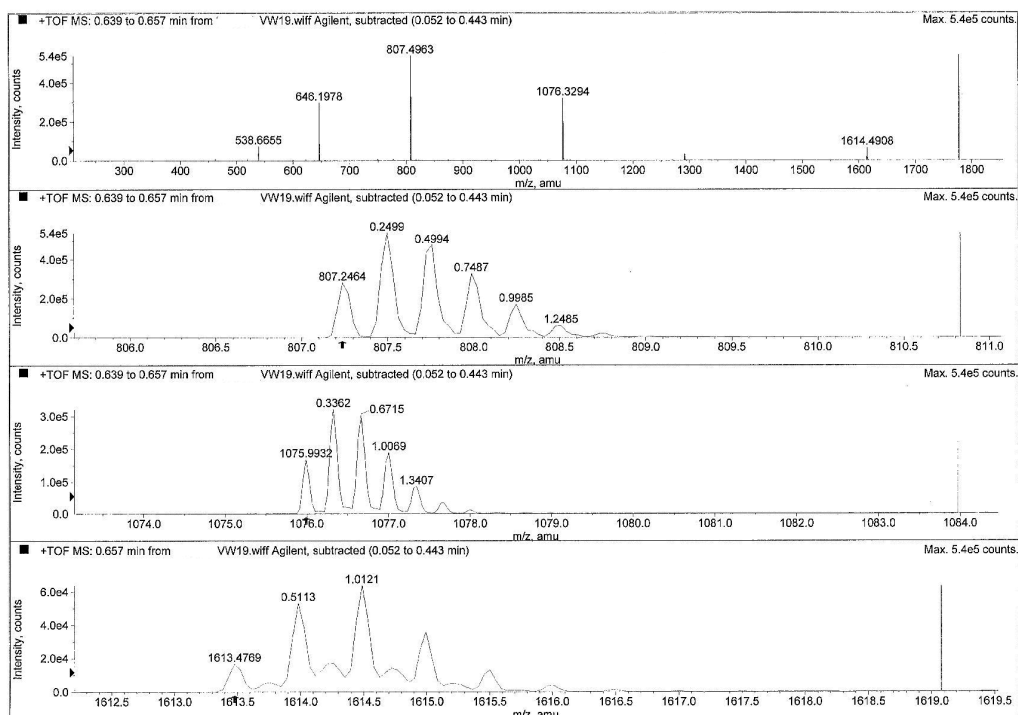

**Figure 9.** ESI-TOF MS of VW19.

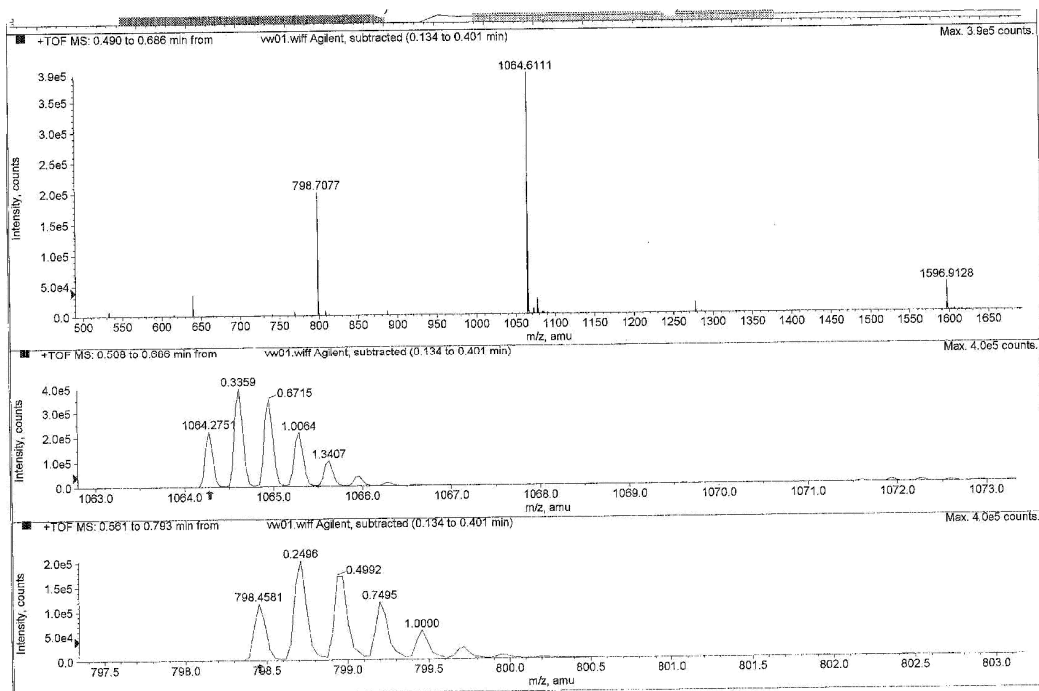

**Figure 10.** ESI-TOF MS of VW01.



**Table S1.** Identification of synthesized polypeptides by ESI-TOF mass spectrometry

| Model Peptides | Observed      |               | Calculated    |               |
|----------------|---------------|---------------|---------------|---------------|
|                | $[M+3H]^{3+}$ | $[M+4H]^{4+}$ | $[M+3H]^{3+}$ | $[M+4H]^{4+}$ |
| VW01           | 1064.6111     | 798.7077      | 1064.2658     | 798.4513      |
| VW19           | 1075.9932     | 807.2464      | 1075.9863     | 807.2417      |
| VW01-ran       | 1064.6071     | 798.7064      | 1064.2658     | 798.4513      |
